# Supplementary material
Source: MDPI journal article supplement (https://www.mdpi.com/2504-5377/8/1/1)
Supplement: s1 [file s1]

## **SUPPORTING INFORMATION**

### **The Effect of copolymer-based nanoparticle composition (MEO<sub>2</sub>MA-OEGMA) on the release profile of doxorubicin *in vitro***

**Zied Ferjaoui<sup>1</sup>, Eric Gaffet<sup>1</sup> and Halima Alem<sup>1, \*</sup>**

<sup>1</sup>Institut Jean Lamour (IJL, UMR 7198), Université de Lorraine - CNRS F-54000 Nancy, France;

\*Correspondence: [halima.alem@univ-lorraine.fr](mailto:halima.alem@univ-lorraine.fr)

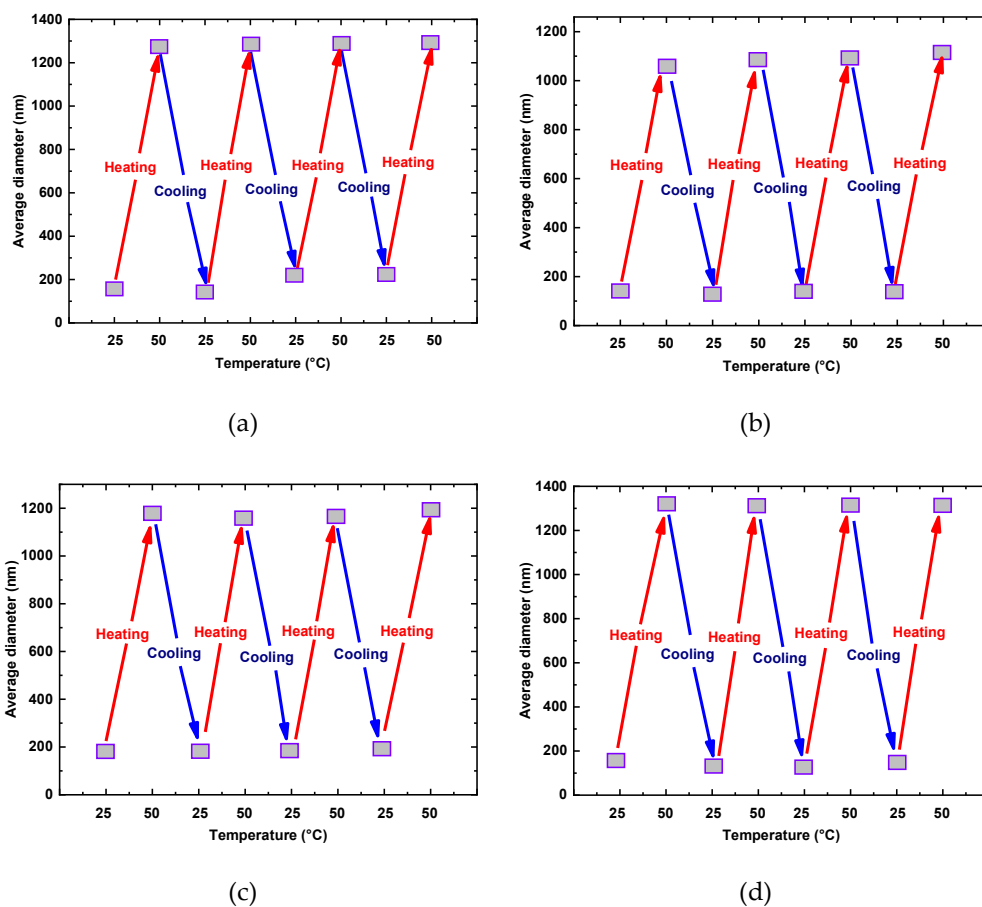

**Figure S 1.** Reversibility of the hydrodynamic diameter evolution with successive heating and cooling cycles in PBS of (a)  $\text{Fe}_{3-\delta}\text{O}_4@\text{P}(\text{MEO}_2\text{MA}_{40}\text{-OEGMA}_{60})$  NPs, (b)  $\text{Fe}_{3-\delta}\text{O}_4@\text{P}(\text{MEO}_2\text{MA}_{50}\text{-OEGMA}_{50})$  NPs, (c)  $\text{Fe}_{3-\delta}\text{O}_4@\text{P}(\text{MEO}_2\text{MA}_{75}\text{-OEGMA}_{25})$  NPs and (d)  $\text{Fe}_{3-\delta}\text{O}_4@\text{P}(\text{MEO}_2\text{MA}_{80}\text{-OEGMA}_{20})$  NPs.

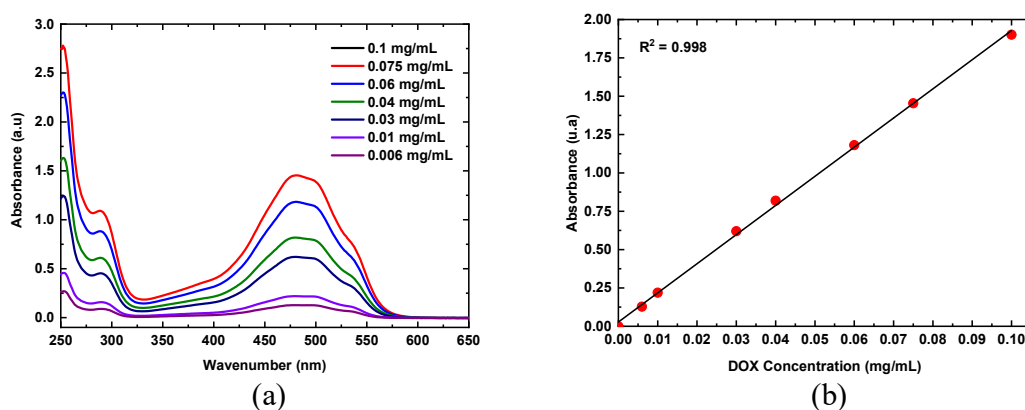

**Figure S 2.** Absorbances of different DOX concentration solutions (a) and Calibration curve of DOX (b)
